# Supplementary material
Source: Springer Nature journal article supplement (https://www.springermedizin.de/resource/supplementary/13550_2012_71_MOESM6_ESM.pdf/9687552)

**Supplementary Figure 9. Contrast recovery as a function of the number of iterations for the Siemens Symbia T6.** Reconstructions were performed with Siemens Flash3D including attenuation and scatter correction and resolution recovery and eight subsets. (A, B) Hot rods. (C, D) Cold rods. (A, C) Full ROI. (B, D) Half ROI.

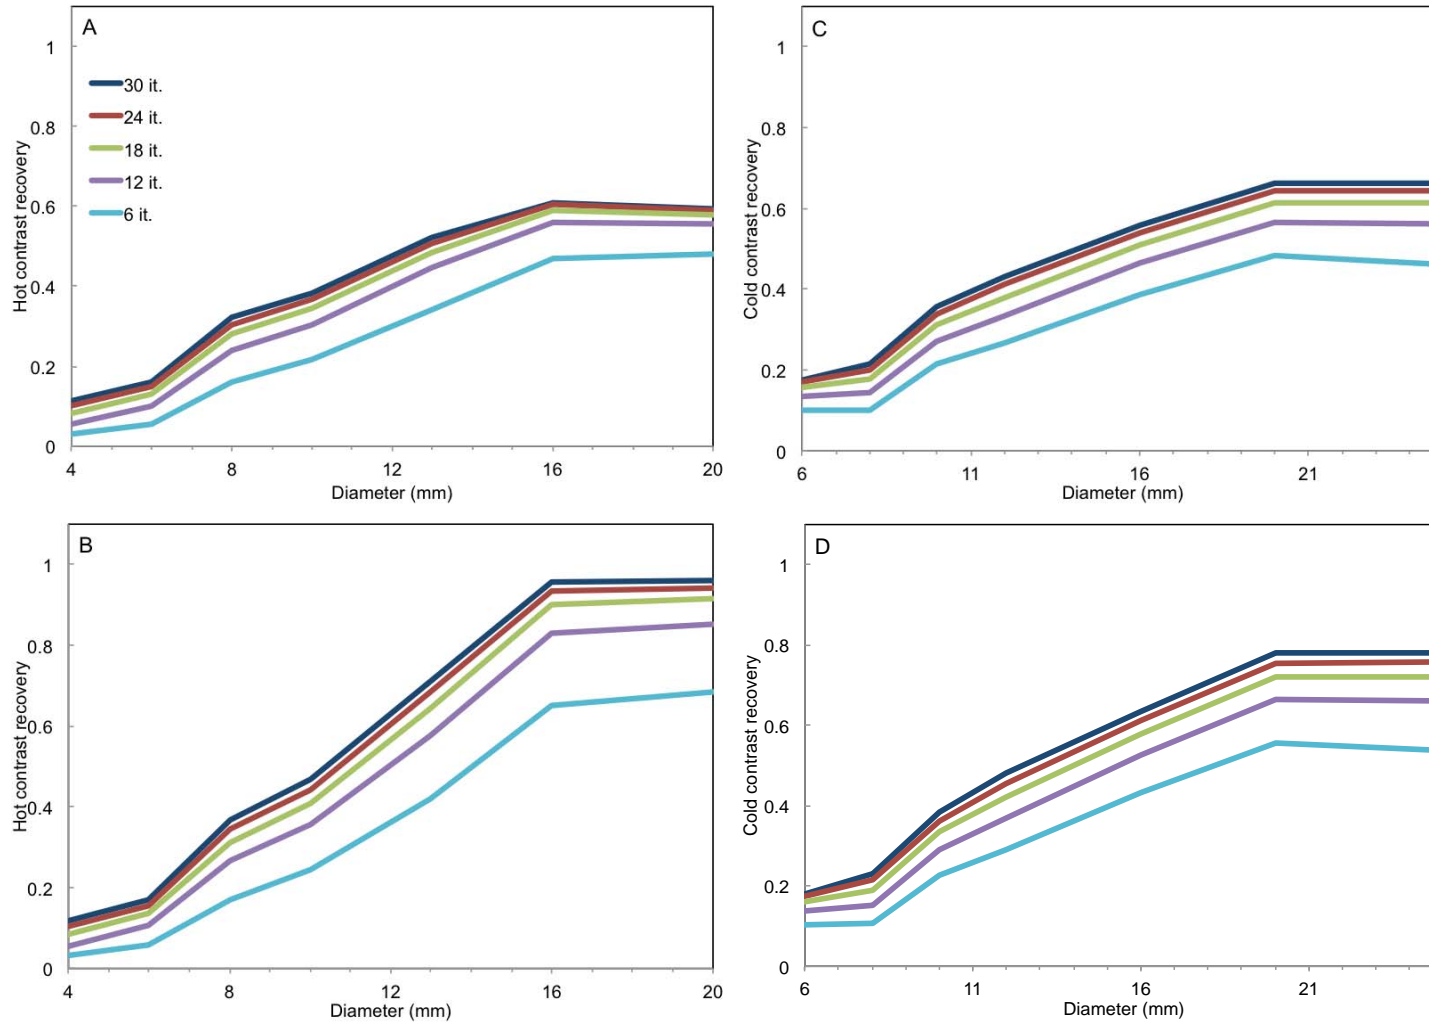

Supplement: MOESM6 [file 9687552]
